# Supplementary material for: A Novel Variable Selection Method Based on Binning-Normalized Mutual Information for Multivariate Calibration
Source: MDPI journal article supplement (doi:10.3390/molecules28155672), 2023-07-26
Supplement: s1 [file s1]

## Supporting Information

### **A novel variable selection method based on binning-normalized mutual information for multivariate calibration**

Liang Zhong<sup>a,†</sup>, Ruiqi Huang<sup>a,†</sup>, Lele Gao<sup>a</sup>, Jianan Yue<sup>a</sup>, Bing Zhao<sup>a</sup>, Lei Nie<sup>a</sup>, Lian Li<sup>a</sup>, Aoli Wu<sup>a</sup>, Kefan Zhang<sup>a</sup>, Zhaoqing Meng<sup>d</sup>, Guiyun Cao<sup>d</sup>, Hui Zhang<sup>a,b,\*</sup>, Hengchang Zang<sup>a,b,c,\*</sup>

<sup>a</sup> NMPA Key Laboratory for Technology Research and Evaluation of Drug Products, School of Pharmaceutical Sciences, Cheeloo College of Medicine, Shandong University, Jinan, 250012, Shandong, China

<sup>b</sup> National Glycoengineering Research Center, Shandong University, Jinan 250012, Shandong, China

<sup>c</sup> Key Laboratory of Chemical Biology (Ministry of Education), Shandong University, Jinan, 250012, China

<sup>d</sup> Shandong Hongjitang Pharmaceutical Group Co. Ltd., Jinan 250103, China

\* Correspondence: zanghcw@126.com; Tel.: +86 531 88380268

\*Hui Zhang and Hengchang Zang are corresponding authors.

† These authors contributed equally to this work and should be regarded as co-first authors.

**Table S1.** The results of PLSR model after SNV preprocessing in different variable selection methods for the fluidized bed granulation dataset.

| Models            | $R^2_C$      | $R^2_P$      | RMSEC        | RMSECV       | RMSEP        | RPD          | Bias         | Number of variables | LVs      |
|-------------------|--------------|--------------|--------------|--------------|--------------|--------------|--------------|---------------------|----------|
| FULL-PLSR         | 0.975        | 0.964        | 0.321        | 0.334        | 0.390        | 5.304        | -0.055       | 125                 | 5        |
| VIP-PLSR          | 0.951        | 0.956        | 0.451        | 0.460        | 0.430        | 4.805        | -0.090       | 30                  | 3        |
| CC- PLSR          | 0.975        | 0.965        | 0.321        | 0.334        | 0.388        | 5.325        | -0.051       | 123                 | 5        |
| UVE-PLSR          | 0.975        | 0.966        | 0.322        | 0.335        | 0.382        | 5.405        | -0.022       | 72                  | 5        |
| CARS-PLSR         | 0.972        | 0.963        | 0.341        | 0.349        | 0.396        | 5.219        | -0.055       | 5                   | 4        |
| BIPLS             | 0.976        | 0.967        | 0.313        | 0.313        | 0.377        | 5.483        | -0.127       | 88                  | 5        |
| <b>B-NMI-PLSR</b> | <b>0.972</b> | <b>0.967</b> | <b>0.337</b> | <b>0.349</b> | <b>0.374</b> | <b>5.531</b> | <b>0.044</b> | <b>49</b>           | <b>5</b> |

**Table S2.** The results of PLSR model after SNV preprocessing in different variable selection methods for the corn protein dataset.

| Models            | $R^2_C$      | $R^2_P$      | RMSEC        | RMSECV       | RMSEP        | RPD          | Bias          | Number of variables | LVs      |
|-------------------|--------------|--------------|--------------|--------------|--------------|--------------|---------------|---------------------|----------|
| FULL-PLSR         | 0.954        | 0.915        | 0.111        | 0.144        | 0.122        | 3.517        | -0.027        | 700                 | 7        |
| VIP-PLSR          | 0.933        | 0.849        | 0.134        | 0.167        | 0.163        | 2.644        | -0.027        | 256                 | 8        |
| CC- PLSR          | 0.942        | 0.946        | 0.125        | 0.167        | 0.097        | 4.420        | -0.031        | 126                 | 8        |
| UVE-PLSR          | 0.963        | 0.942        | 0.099        | 0.146        | 0.101        | 4.246        | -0.011        | 287                 | 7        |
| CARS-PLSR         | 0.974        | 0.919        | 0.083        | 0.103        | 0.119        | 3.604        | -0.005        | 21                  | 8        |
| BIPLS             | 0.968        | 0.950        | 0.093        | 0.110        | 0.093        | 4.604        | -0.002        | 163                 | 6        |
| <b>B-NMI-PLSR</b> | <b>0.941</b> | <b>0.972</b> | <b>0.126</b> | <b>0.152</b> | <b>0.070</b> | <b>6.147</b> | <b>-0.009</b> | <b>37</b>           | <b>7</b> |
